# Supplementary material
Source: PubMed Central journal article supplement (PMC4126852)
Supplement: NIHMS561296-supplement-2.pdf [file NIHMS561296-supplement-2.pdf]

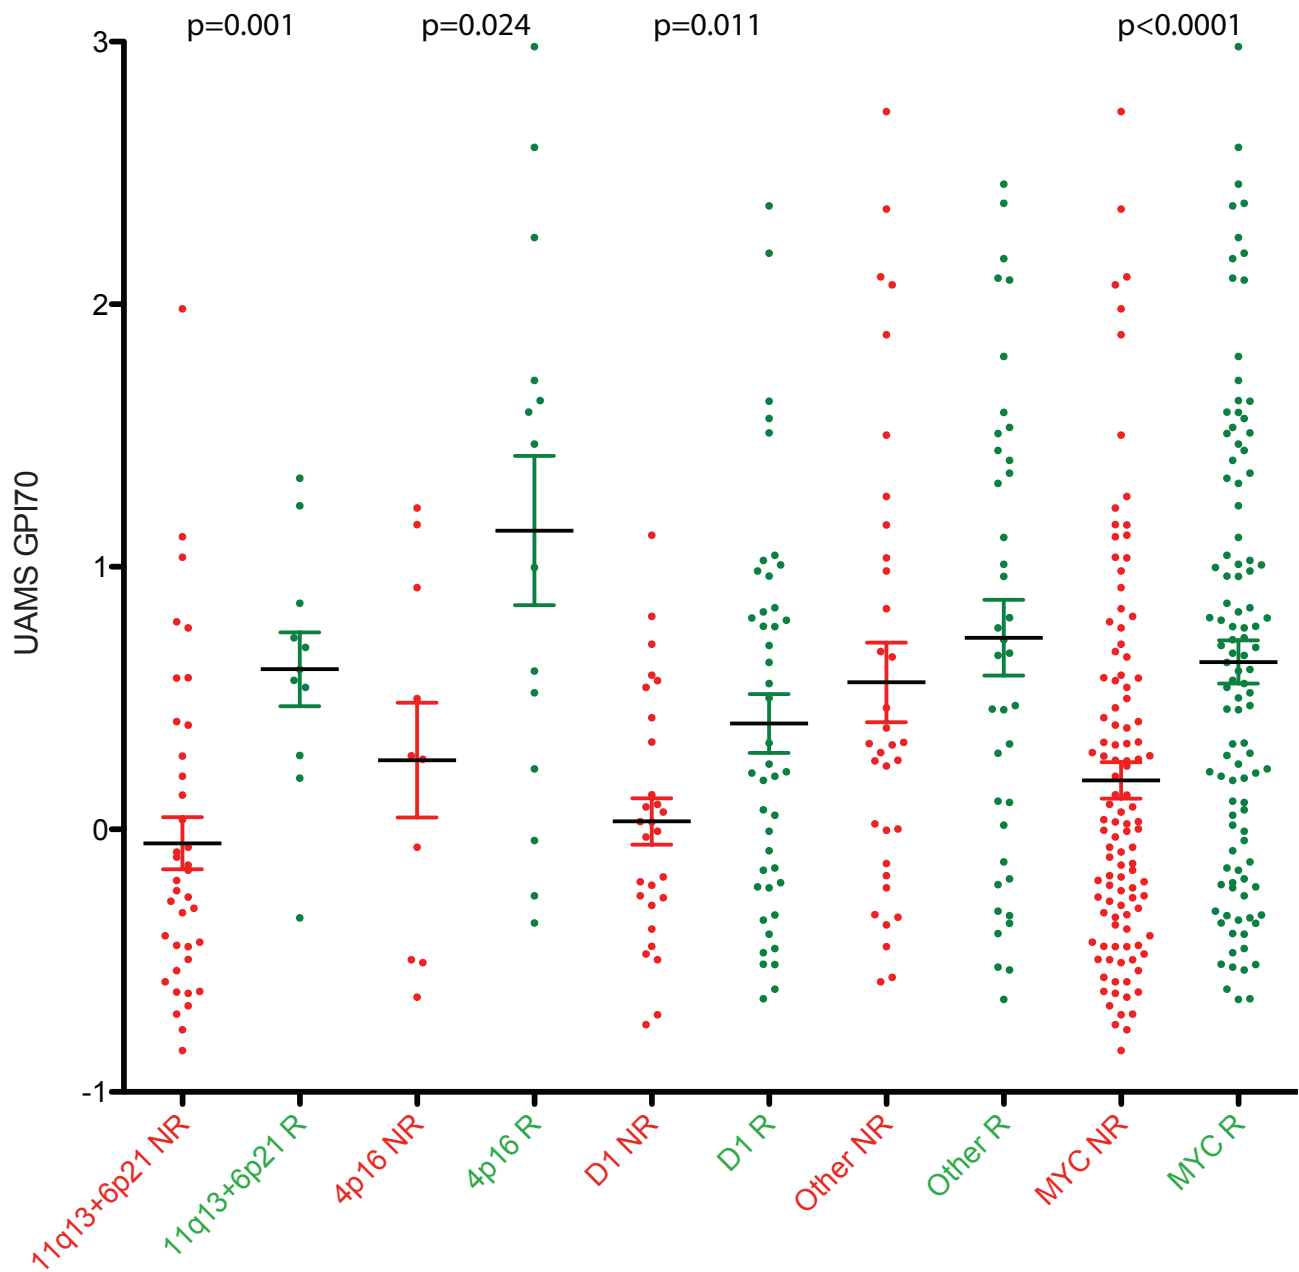

**Supplemental Figure 1**

The UAMS GPI70 risk score is plotted for samples with (R) and without (NR) MYC rearrangements for all patients (MYC), and for different TC group. The black line indicates the mean, and the error bars the standard error of the mean. The p-values for a Welch's corrected two-sided t-test are shown.
