# Supplementary material
Source: PubMed Central journal article supplement (PMC4126852)
Supplement: NIHMS561296-supplement-4.pdf [file NIHMS561296-supplement-4.pdf]

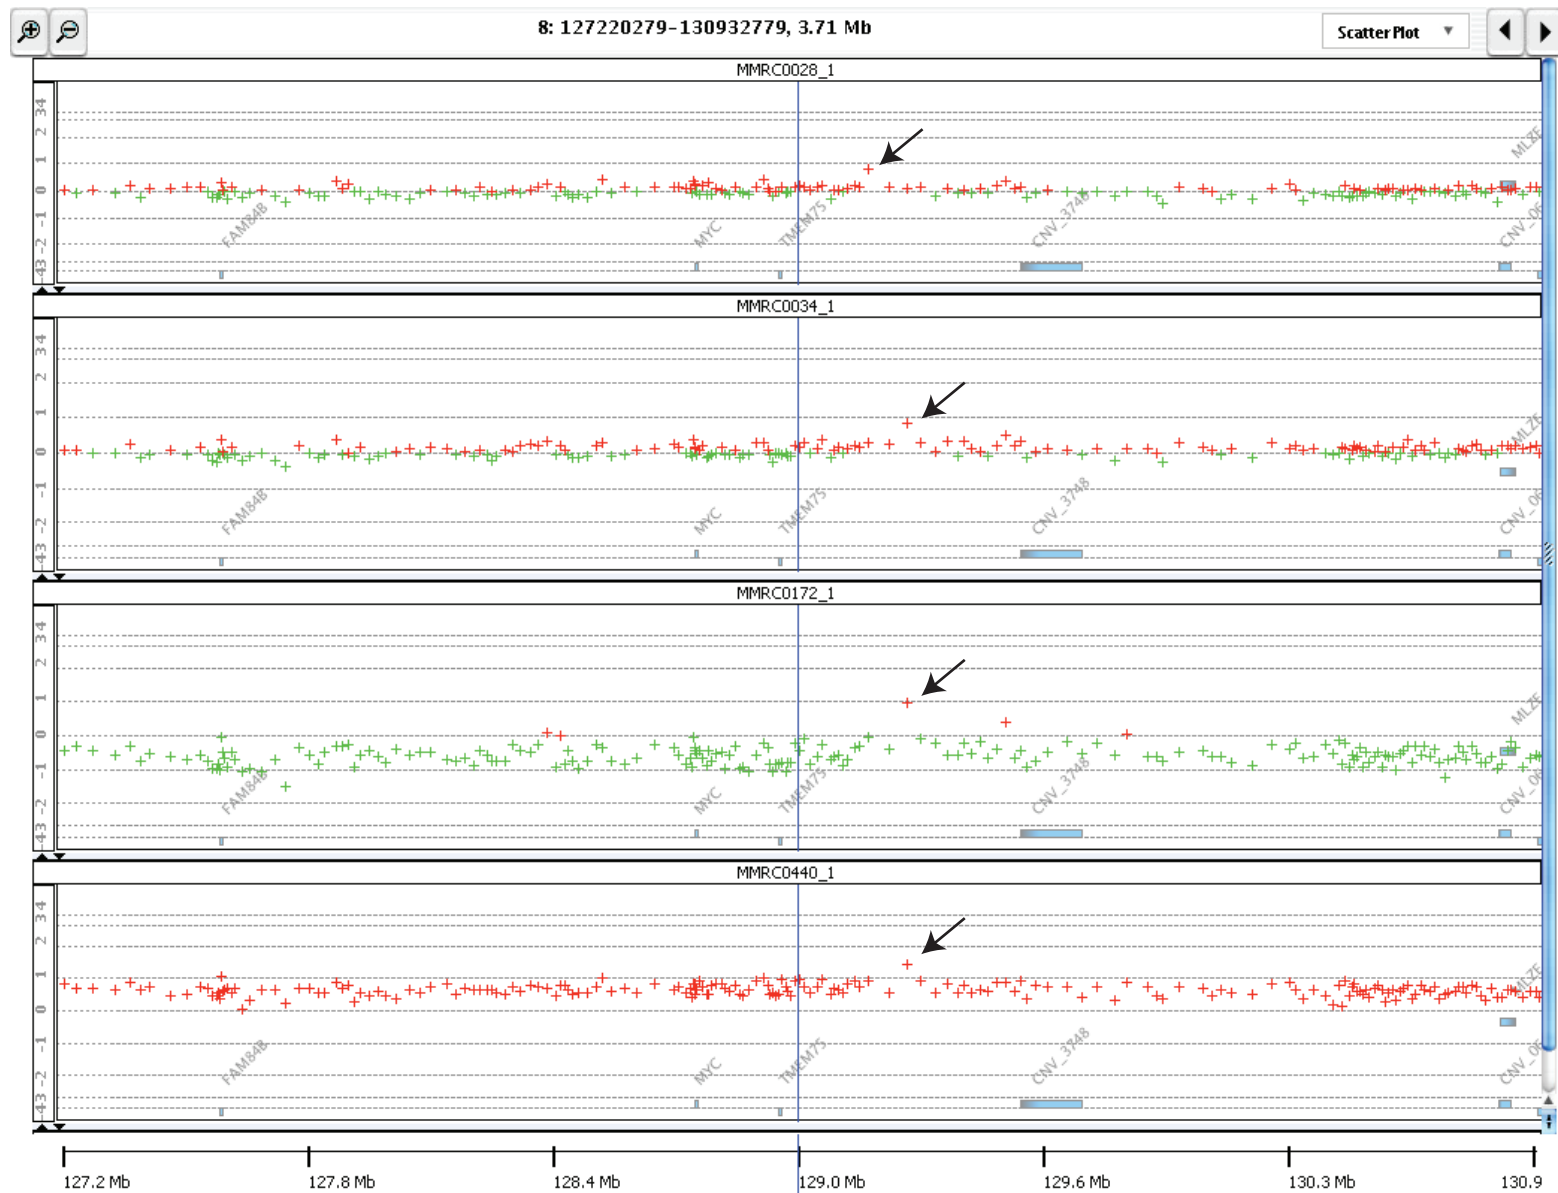

**Supplemental Figure 3. Four MM samples with single probe copy number abnormalities**

Agilent 244k CGH viewed in Agilent Genomic Workbench showing four MM samples with single probe abnormalities in the region of MYC telomeric segmental gain.
